# Supplementary material for: A Predictive Model and Risk Factors for Case Fatality of COVID-19
Source: MDPI journal article supplement (doi:10.3390/jpm11010036), 2021-01-08
Supplement: s1 [file s1]

|                               | Date | Basic   |            | Satu    |
|-------------------------------|------|---------|------------|---------|
|                               |      | Model   | Aplication | Model   |
| Constante                     |      | -4.3906 | (4.3906)   | -5.0732 |
| Age (years)                   | 70   | 0.0417  | 2.9184     | 0.0393  |
| Female gender (1 yes/0 not)   | 0    | -0.4843 | -          | -0.3762 |
| Comorbidities                 | 6.15 | 0.0964  | 0.5929     | 0.0888  |
| Oxygen saturation Extreme Low | 0    |         |            | 3.1240  |
| Oxygen saturation Low         | 0    |         |            | 1.4683  |
| Oxygen saturation Medium      | 1    |         |            | 0.7976  |
| CRP (Proteína C-reactiva)     | 120  |         |            |         |
| Leukocytes                    | 10.5 |         |            |         |
| Lymphocytes/ Leukocytes ratio | 0.1  |         |            |         |
| D-Dimero                      | 3.0  |         |            |         |
| Score                         |      |         | (0.8794)   |         |
| Probability ICU-Exitus        |      |         | 29.3%      |         |

| ration          | Saturation and Analitic |                 |
|-----------------|-------------------------|-----------------|
| Aplication      | Model                   | Aplication      |
| (5.0732)        | -4.4889                 | (4.4889)        |
| 2.7526          | 0.0254                  | 1.7756          |
| -               | -0.2733                 | -               |
| 0.5460          | 0.0830                  | 0.5102          |
| -               | 2.4006                  | -               |
| -               | 1.0468                  | -               |
| 0.7976          | 0.6528                  | 0.6528          |
|                 | 0.0039                  | 0.4642          |
|                 | 0.0562                  | 0.5896          |
|                 | -3.1445                 | (0.3145)        |
|                 | 0.0206                  | 0.0617          |
| <b>(0.9770)</b> |                         | <b>(0.7491)</b> |
| <b>27.3%</b>    |                         | <b>32.1%</b>    |
