# Supplementary material for: A Predictive Model and Risk Factors for Case Fatality of COVID-19
Source: MDPI journal article supplement (doi:10.3390/jpm11010036), 2021-01-08
Supplement: s1 [file s1]

| Group                      | Comorbidities            | CH-HM |      | MH-HUPA |      | GLO   |
|----------------------------|--------------------------|-------|------|---------|------|-------|
|                            |                          | %     | OR   | %       | OR   | %     |
| Hypertension               | Arterial hypertension    | 42,5% | 1,90 | 65,6%   | 1,77 | 45,6% |
|                            | <i>Total</i>             | 42,5% | 1,90 | 65,6%   | 1,77 | 45,6% |
| Cardiopathies              | COR pulmonale            | 6,8%  | 2,37 | 9,8%    | 1,67 | 7,3%  |
|                            | Ischemic heart disease   | 6,9%  | 1,69 | 10,4%   | 1,72 | 7,1%  |
|                            | Heart failure            | 4,8%  | 2,13 | 10,8%   | 3,54 | 6,6%  |
|                            | <i>Total</i>             | 15,8% | 2,21 | 25,5%   | 2,48 | 17,5% |
| Metabolic-endocrine        | Diabetes                 | 17,3% | 1,44 | 30,6%   | 1,48 | 20,1% |
|                            | Hypothyroidism           | 6,8%  | 0,74 | 6,8%    | 0,73 | 6,3%  |
|                            | Obesity                  | 7,5%  | 1,16 | 13,5%   | 1,23 | 8,8%  |
|                            | <i>Total</i>             | 28,1% | 1,21 | 42,6%   | 1,30 | 30,3% |
| Respiratory illnesses      | ASTHMA                   | 4,7%  | 0,91 | 11,6%   | 0,68 | 6,4%  |
|                            | COPD                     | 7,8%  | 2,20 | 12,2%   | 1,79 | 7,9%  |
|                            | Others                   | 2,1%  | 1,37 | 4,7%    | 1,67 | 2,6%  |
|                            | <i>Total</i>             | 13,7% | 1,55 | 24,5%   | 1,25 | 15,3% |
| Nephropathies              | Acute renal failure      | 8,9%  | 6,36 | 16,9%   | 3,04 | 11,5% |
|                            | Chronic renal failure    | 5,6%  | 2,22 | 13,7%   | 2,20 | 7,3%  |
|                            | <i>Total</i>             | 11,8% | 4,97 | 25,0%   | 2,66 | 15,1% |
| Solid neoplasia            | Colon cancer             | 0,7%  | 6,85 | 0,7%    | 2,53 | 0,6%  |
|                            | Breast cancer            | 0,5%  | 1,81 | 0,3%    | 2,02 | 0,4%  |
|                            | Respiratory / lung cance | 1,2%  | 2,56 | 1,5%    | 0,79 | 1,0%  |
|                            | <i>Total</i>             | 2,4%  | 3,24 | 2,6%    | 1,30 | 1,9%  |
| Hematological neoplasia    | Leukemia                 | 0,9%  | 1,63 | 1,4%    | 2,55 | 0,9%  |
|                            | Lymphoma                 | 0,8%  | 1,92 | 1,0%    | 0,46 | 0,6%  |
|                            | Multiple myeloma         | 0,6%  | 1,58 | 0,7%    | 1,73 | 0,6%  |
|                            | <i>Total</i>             | 2,3%  | 1,73 | 3,1%    | 1,53 | 2,1%  |
| Autoimmune intestinalis    | Ulcerative colitis       | 0,5%  | 1,81 | 0,4%    | 1,21 | 0,5%  |
|                            | <i>Total</i>             | 0,5%  | 1,81 | 0,4%    | 1,21 | 0,5%  |
| Autoimmune rheumatological | Rheumatoid arthritis     | 1,1%  | 0,66 | 2,1%    | 1,52 | 1,4%  |
|                            | Spondyloarthritis        | 3,5%  | 1,45 | 3,0%    | 1,63 | 3,0%  |
|                            | Psoriasis                | 0,8%  | 1,05 | 2,4%    | 0,47 | 1,0%  |
|                            | Vasculitis               | 1,5%  | 1,70 | 4,3%    | 1,20 | 2,5%  |
|                            | <i>Total</i>             | 6,6%  | 1,33 | 11,6%   | 1,22 | 7,7%  |
| Urinary infection          | Urinary infection        | 4,6%  | 2,04 | 7,2%    | 1,46 | 5,3%  |
|                            | <i>Total</i>             | 4,6%  | 2,04 | 7,2%    | 1,46 | 5,3%  |
| Neurological               | Dementia                 | 3,7%  | 1,94 | 4,0%    | 1,05 | 3,5%  |
|                            | <i>Total</i>             | 3,7%  | 1,94 | 4,0%    | 1,05 | 3,5%  |

| BAL         |        | Present<br>in patient |
|-------------|--------|-----------------------|
| OR          | Weight |                       |
| 1,90        | 1.9    |                       |
| <i>1,90</i> |        |                       |
| 2,14        | 1.79   |                       |
| 1,77        | 2.34   |                       |
| 2,98        | 2.15   |                       |
| <i>2,44</i> |        |                       |
| 1,53        | 1.42   | 0                     |
| 0,70        | 0.83   |                       |
| 1,35        | 1.17   |                       |
| <i>1,31</i> |        |                       |
| 0,78        | 1.07   |                       |
| 2,18        | 2.09   |                       |
| 1,56        | 1.45   |                       |
| <i>1,46</i> |        |                       |
| 4,64        | 6.15   | 1                     |
| 2,50        | 2.82   |                       |
| <i>3,91</i> |        |                       |
| 5,36        | 4.33   | 0                     |
| 1,57        | 2.88   |                       |
| 1,86        | 2.94   |                       |
| <i>2,53</i> |        |                       |
| 2,06        | 1.69   |                       |
| 1,65        | 1.8    |                       |
| 1,52        | 1.69   |                       |
| <i>1,79</i> |        |                       |
| 1,47        | 1.81   |                       |
| <i>1,47</i> |        |                       |
| 1,28        | 1.05   |                       |
| 1,28        | 1.41   |                       |
| 0,70        | 1.24   |                       |
| 1,28        | 1.51   |                       |
| <i>1,23</i> |        |                       |
| 1,85        | 2.04   |                       |
| <i>1,85</i> |        |                       |
| 1,52        | 1.94   |                       |
| <i>1,52</i> |        |                       |
| Total       |        | 6.15                  |
